# Supplementary material
Source: publisher site journal article supplement (https://www.dovepress.com/article/492205)
Supplement: Supplementary file 1 [file get_supplementary_file.php]

**Supplement 1**

EMethods

eFigure 1. The Theoretical Underpinnings and Principal Assumptions of Mendelian Randomization.

eFigure 2. Bayesian Colocalization Analysis to Unveil Potential Causal Links Between Specific Plasma Proteins and Psoriasis.

eFigure 3. Phenome-Wide Association Insights via Mendelian Randomization: Implications of Six Psoriasis-Related Drug Targets on Disease Spectrum.

eFigure 4. Comparative Serum Protein Expression Analysis of Drug Targets in psoriasis.

eTable 1. Details of 10 plasma proteins significantly associated with psoriasis.

eTable 2. STROBE-MR checklist of recommended items to address in reports of Mendelian randomisation studies.

eTable 3. Details of the source GWAS data.

eTable 4. Details of the single cell RNAseq data of psoriasis.

eTable 5. Associations of circulating protein levels with incident psoriasis

eTable 6. CIS-pQTL available in UKB-PPP cohort database

eTable 7. Associations between genetically proxied protein expression and psoriasis

eTable 8. The confuder traits associated with Variants of candidate drugtarget protein.

eTable 9. SMR Associations of Serum Protein Expression with psoriasis.

eTable 10. Coloc colocalization analysis

eMethods

**Mendelian Randomization analysis**

In Mendelian Randomization (MR) analysis, an instrumental variable must meet three core criteria to be considered valid. These criteria are detailed in eFigure 1 of Supplement 1:

First, strong Association with the Exposure: The genetic variant used as an instrumental variable must have a robust association with the exposure, confirmed by calculating the F-statistic. The F-statistic is derived from the squared beta coefficient divided by the squared standard error, with a value greater than 10 required to avoid weak instrument bias. This ensures the instrument's strength and relevance in MR analysis.

Second, Independence from Confounders: The genetic variants must not be associated with any confounders that could influence the exposure-outcome relationship. Using the PhenoScanner database1, we identified traits significantly associated with psoriasis (at P < 5×10-8) other than the exposure. Known psoriasis risk factors, such as body mass index, smoking, and body fat percentage, were considered, and variants linked to these confounders were excluded. This step helps minimize horizontal pleiotropy, ensuring that the variants affect the outcome only through their relationship with the exposure.

Third, Specific Effect on the Outcome Through the Exposure: The genetic variants should influence the outcome exclusively via their effect on the exposure. To minimize confounding by population stratification, our analyses focused on individuals of consistent ancestry. Additionally, to address potential confounding by linkage disequilibrium, Summary-data-based Mendelian Randomization (SMR) and Heterogeneity in Dependent Instruments (HEIDI) analysis were employed to assess the possibility of genetic confounding.

To further ensure the validity of our findings, Steiger filtering was implemented to confirm the directionality of the associations between proteins and outcomes2. A P-value threshold of less than 0.05 was maintained throughout to ascertain statistical significance.

**SMR analysis and Heterogeneity in Dependent Instruments (HEIDI) test**

In employing pQTL for research, the SMR method is utilized to derive effect estimates. This approach capitalizes on aggregated data from Genome-Wide Association Studies (GWAS) and pQTL studies to investigate the relationships between protein expression levels and specific health outcomes3. Analysis and allele coordination were executed using the SMR software, version 1.3.1, available at [https://yanglab.westlake.edu.cn/software/smr/]. To amalgamate the effect estimates, an IVW-MR strategy was adopted. The HEIDI test, integral to the SMR framework, was employed to determine if the gene expression-outcome associations could be attributed to linkage scenarios. This is discerned when the HEIDI test produces a p-value of less than 0.01, suggesting a possible linkage origin for the association4.

**Bayesian co-localization analysis**

To evaluate whether two traits—protein expression levels and phenoage—are influenced by identical causal genetic variants, we employed Bayesian co-localization analysis using the 'coloc' package5, accessible at https://github.com/chr1swallace/coloc. This method calculates posterior probabilities for five distinct hypotheses regarding the potential overlap of genetic variants between the proteome and phenoage. Our analysis particularly focused on the posterior probability of hypothesis 3 (PPH3) and hypothesis 4 (PPH4). PPH3 suggests that the protein expression and phenoage are influenced by separate genetic variants within the same region, while PPH4 indicates a shared genetic basis for both traits in the region. To determine evidence of co-localization, we utilized the coloc.abf and coloc.susie algorithms. A gene was considered to show co-localization if it demonstrated a gene-based PPH4 greater than 80%, as confirmed by at least one of the algorithms.

**Phenome-Wide MR Analysis**

To investigate potential adverse reactions associated with the target druggable gene, we conducted phenome-wide MR analyses. In this process, pQTL data related to the druggable gene served as the exposure variable. This data was contrasted with comprehensive GWAS data on a variety of diseases documented within the UK Biobank cohort (n ≤ 408,961), which acted as the outcome variable. Lee et al. have performed GWAS analyses on multiple diseases within the UK Biobank, utilizing the SAIGE (V.0.29) methodology6,7. This approach, known for its adept extension and accurate application of generalized mixed models, effectively navigates the complexities of imbalanced case-control ratios. For our phenome-wide MR explorations, we focused on 1,402 traits, each representing a unique disease with no fewer than 50 reported cases. We sourced composite statistics for disease-associated SNPs from the SAIGE GWAS database (available at: https://www.leelabsg.org/resources), with further methodological details outlined in their publication. The Wald ratio method was applied to perform MR analyses, ensuring a uniform approach to parameter application. A stringent significance threshold of P < 0.05/1,402 was set to identify causally significant associations.

**The Polygenic Risk Score methods**

The Polygenic Risk Score (PRS) was calculated using data from the most extensive genome-wide association study (GWAS) on psoriasis conducted to date8. The genotyping protocols, data imputation methods, and quality control procedures applied to the UK Biobank data have been extensively detailed in prior studies 9,10. In brief, single nucleotide polymorphisms (SNPs) with minor allele frequencies (MAF) below 1% or with informativeness scores below 0.8 were excluded from analysis. SNPs that were mismatched, duplicated, or ambiguous were also omitted. The PRS for each participant was computed using PRSice-2 software, version 2.3.5, which combines the UK Biobank SNP database with GWAS summary statistics and adjusts for sex and ten principal genetic components."

References

1 Kamat MA, Blackshaw JA, Young R, *et al.* PhenoScanner V2: an expanded tool for searching human genotype-phenotype associations. *Bioinformatics* 2019; **35**:4851–3.

2 Hemani G, Tilling K, Davey Smith G. Orienting the causal relationship between imprecisely measured traits using GWAS summary data. *PLoS Genet* 2017; **13**:e1007081.

3 Zhu Z, Zhang F, Hu H, *et al.* Integration of summary data from GWAS and eQTL studies predicts complex trait gene targets. *Nat Genet* 2016; **48**:481–7.

4 Chauquet S, Zhu Z, O’Donovan MC, *et al.* Association of Antihypertensive Drug Target Genes With Psychiatric Disorders: A Mendelian Randomization Study. *JAMA Psychiatry* 2021; **78**:623–31.

5 Wang G, Sarkar A, Carbonetto P, Stephens M. A simple new approach to variable selection in regression, with application to genetic fine mapping. *J R Stat Soc Series B Stat Methodol* 2020; **82**:1273–300.

6 Zhou W, Nielsen JB, Fritsche LG, *et al.* Efficiently controlling for case-control imbalance and sample relatedness in large-scale genetic association studies. *Nat Genet* 2018; **50**:1335–41.

7 Zhou W, Bi W, Zhao Z, *et al.* SAIGE-GENE+ improves the efficiency and accuracy of set-based rare variant association tests. *Nat Genet* 2022; **54**:1466–9.

8 Tsoi LC, Stuart PE, Tian C, *et al.* Large scale meta-analysis characterizes genetic architecture for common psoriasis associated variants. *Nat Commun* 2017; **8**:15382.

9 Sudlow C, Gallacher J, Allen N, *et al.* UK biobank: an open access resource for identifying the causes of a wide range of complex diseases of middle and old age. *PLoS Med* 2015; **12**:e1001779.

10 Bycroft C, Freeman C, Petkova D, *et al.* The UK Biobank resource with deep phenotyping and genomic data. *Nature* 2018; **562**:203–9.


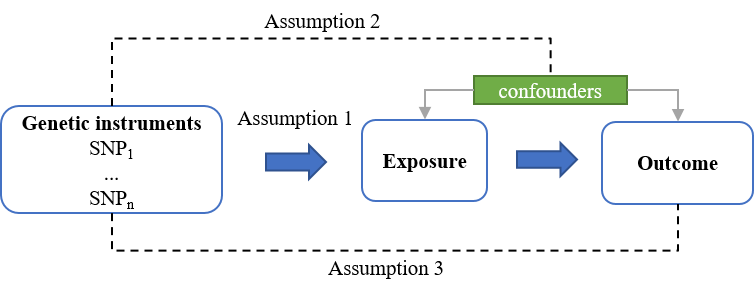


**eFigure 1**: The Theoretical Underpinnings and Principal Assumptions of Mendelian Randomization. This figure outlines the conceptual framework foundational to Mendelian Randomization (MR) studies, delineating its core assumptions critical for valid causal inference. Assumption 1 mandates that the genetic variant demonstrates a strong association with the exposure of interest. Assumption 2 requires that the instrumental genetic variants are not influenced by confounders that could affect the relationship between the exposure and outcome. Finally, Assumption 3 stipulates that the genetic variants impact the outcome solely through their effect on the exposure, ensuring a direct causal pathway.


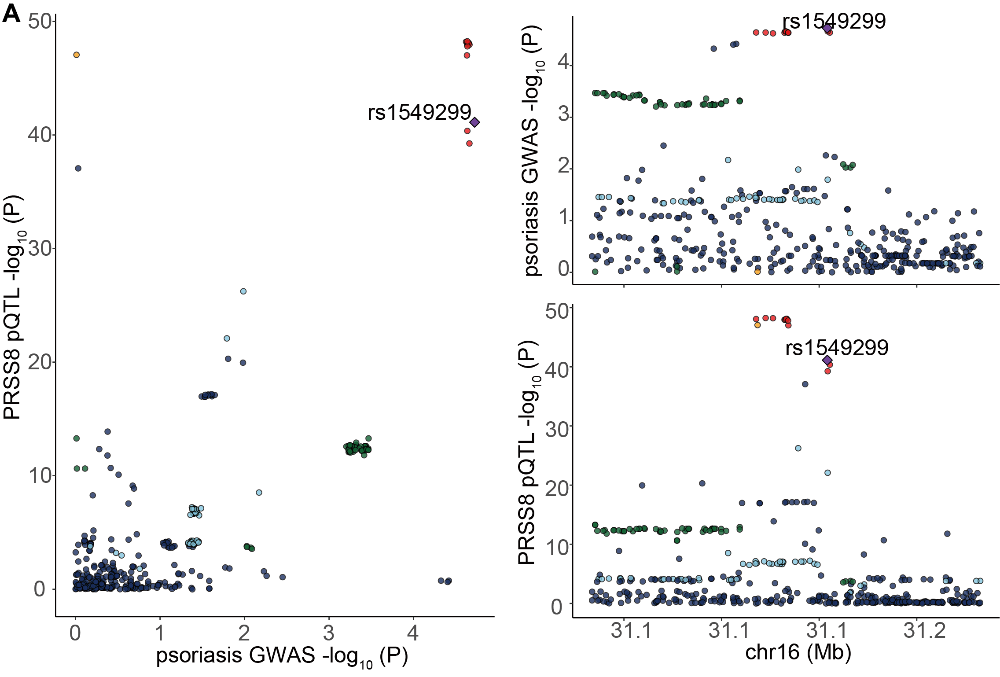


**eFigure** **2**: Bayesian Colocalization Analysis to Unveil Potential Causal Links Between Specific Plasma Proteins and Psoriasis. Analysis of PRSS8 and Psoriasis: Illustrates colocalization analysis results for the PRSS8 plasma protein in the context of psoriasis. Purple diamond-shaped markers denote single nucleotide polymorphisms (SNPs) that exhibit the lowest combined p-value from both the genome-wide association studies (GWAS) for the PRSS8 protein and the GWAS for traits related to inflammatory skin diseases.


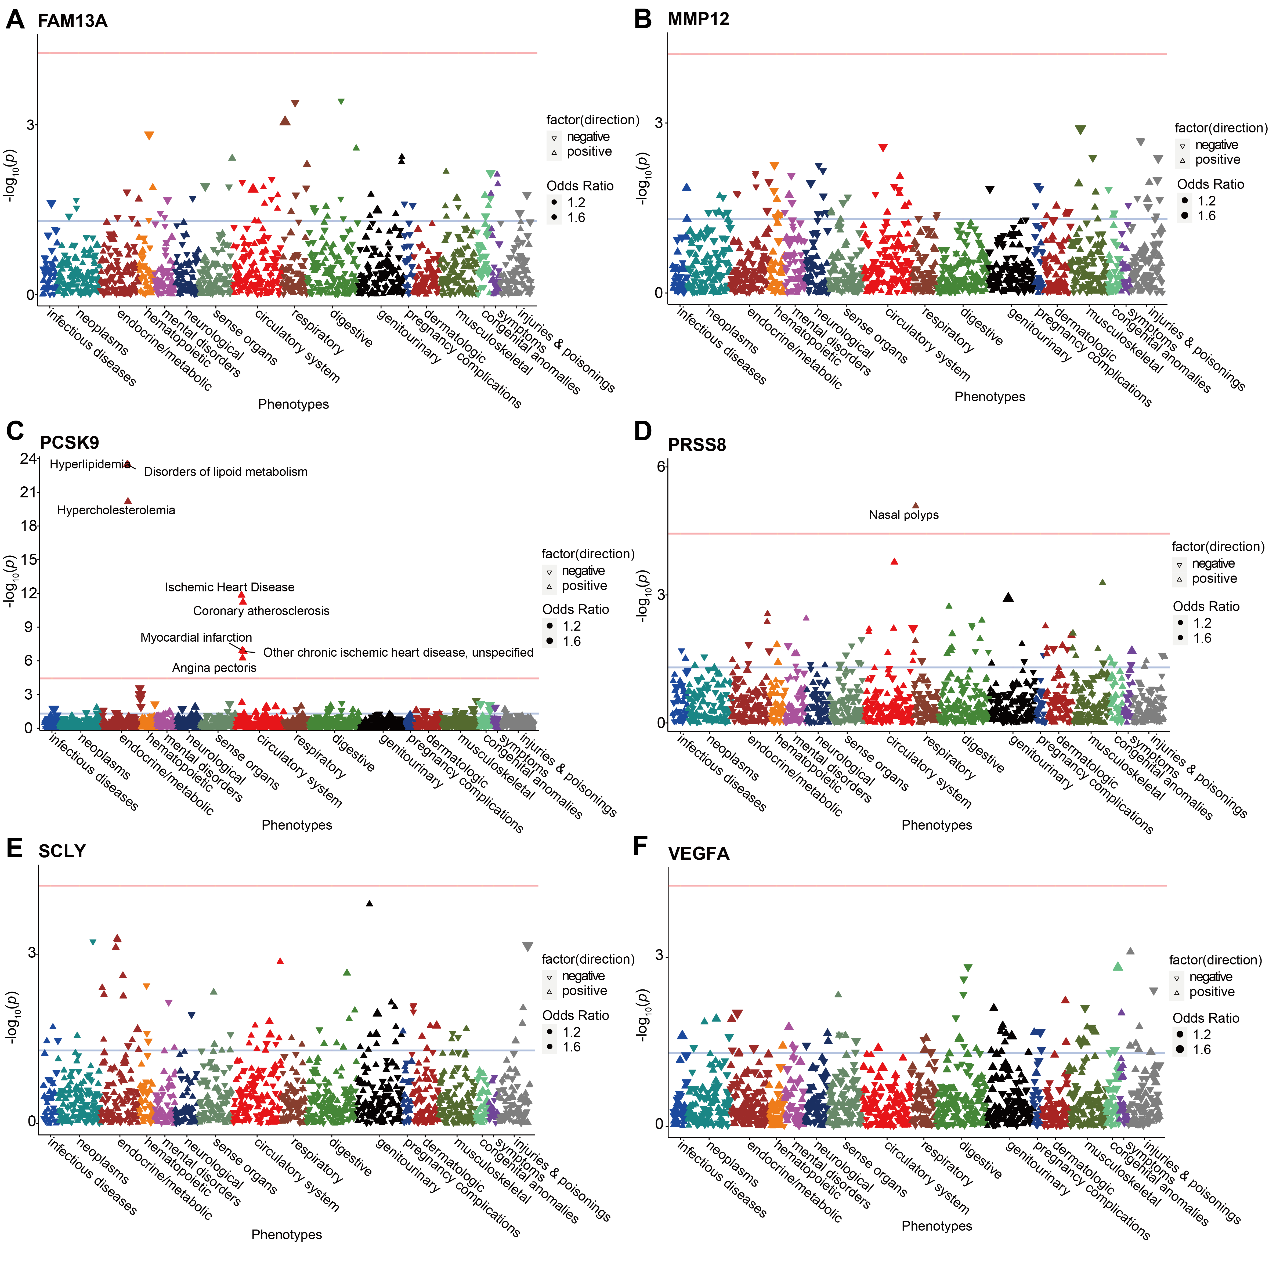


**eFigure 3:** Phenome-Wide Association Insights via Mendelian Randomization: Implications of Six Psoriasis-Related Drug Targets on Disease Spectrum.

This figure presents a Manhattan plot derived from a phenome-wide Mendelian Randomization (MR) analysis, exploring the impact of six psoriasis-associated blood expression drug targets (FAM13A, MMP12, PCSK9, PRSS8, SCLY, and VEGFA) across a comprehensive range of 1,402 diseases cataloged in the UK Biobank (UKB). The y-axis highlights the p-values obtained from the phenome-wide MR analysis, where a gray line marks the conventional significance threshold of p < 0.05, and a pink line indicates an adjusted significance threshold of p < 3.56e-5, accounting for multiple testing (0.05 divided by 1,402). Each triangle symbol represents a specific disease outcome, with upward-facing triangles indicating a positive causal effect of the blood protein on the disease, and downward-facing triangles denoting a negative causal relationship.


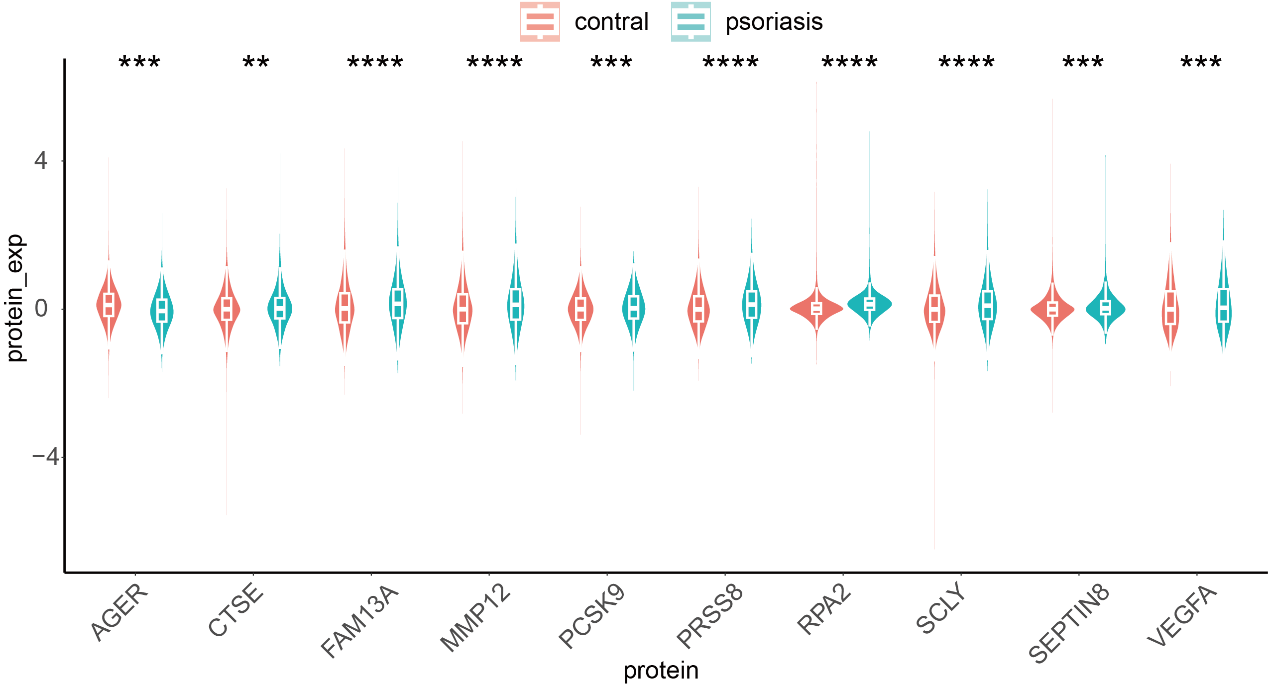


**eFigure 4**: Comparative Serum Protein Expression Analysis of Drug Targets in Psoriasis
This figure employs violin plots to illustrate the differential expression levels of serum proteins associated with ten drug targets in psoriasis. Differential coloring is used to distinguish the normal control group (red) from patients with psoriasis. Statistical significance is annotated as follows: 'ns' indicates no significant difference; two asterisks (**) denote p < 0.01; three asterisks (***) represent p < 0.001; and four asterisks (****) signal p < 0.0001.

**eTable 1. Details of 10 plasma proteins significantly associated with psoriasis.**

| **Olink ID** | **Gene symbol** | **UniProt** | **Gene CHROM** | **Gene start** | **Gene end** |
| --- | --- | --- | --- | --- | --- |
| OID20756 | AGER | Q15109 | 6 | 32180968 | 32184322 |
| OID30628 | CTSE | P14091 | 1 | 206008535 | 206023909 |
| OID31463 | FAM13A | O94988 | 4 | 88725955 | 89111398 |
| OID21439 | MMP12 | P39900 | 11 | 102862736 | 102874982 |
| OID20235 | PCSK9 | Q8NBP7 | 1 | 55039447 | 55064852 |
| OID20763 | PRSS8 | Q16651 | 16 | 31131433 | 31135727 |
| OID30453 | RPA2 | P15927 | 1 | 27891524 | 27914746 |
| OID21425 | SCLY | Q96I15 | 2 | 238060924 | 238099413 |
| OID31079 | SEPTIN8 | Q92599 | 5 | 132750819 | 132807241 |
| OID20650 | VEGFA | P15692 | 6 | 43770184 | 43786487 |

| **eTable 2. STROBE-MR checklist of recommended items to address in reports of Mendelian randomisation studies** | | | |
| --- | --- | --- | --- |
| **Item No.** | **Section** | **Checklist item** | **Section (paragraph number)** |
| 1 | **TITLE and ABSTRACT** | Indicate Mendelian randomisation as the study’s design in the title and/or the abstract if that is a main purpose of the study | Title page & Abstract page |
|  | **INTRODUCTION** |  |  |
| 2 | **Background** | Explain the scientific background and rationale for the reported study. What is the exposure? Is a potential causal relationship between exposure and outcome plausible? Justify why MR is a helpful method to address the study question | Introduction (paragraphs 1-2) |
| 3 | **Objectives** | State specific objectives clearly, including pre-specified causal hypotheses (if any). State that MR is a method that, under specific assumptions, intends to estimate causal effects | Introduction (paragraph 3) & Figure 1 |
|  | **METHODS** |  |  |
| 4 | **Study design and data sources** | Present key elements of the study design early in the article. Consider including a table listing sources of data for all phases of the study. For each data source contributing to the analysis, describe the following: | Methods (Mendelian Randomization analysis & eTable 3) |
|  | a) | Setting: Describe the study design and the underlying population, if possible. Describe the setting, locations, and relevant dates, including periods of recruitment, exposure, follow-up, and data collection, when available. | Methods (Mendelian Randomization analysis & eTable 3) |
|  | b) | Participants: Give the eligibility criteria, and the sources and methods of selection of participants. Report the sample size, and whether any power or sample size calculations were carried out prior to the main analysis | Methods (Mendelian Randomization analysis & eTable 3) |
|  | c) | Describe measurement, quality control and selection of genetic variants | Methods (Mendelian Randomization analysis & eTable 3) |
|  | d) | For each exposure, outcome, and other relevant variables, describe methods of assessment and diagnostic criteria for diseases | Methods (Mendelian Randomization analysis & eTable 3) |
|  | e) | Provide details of ethics committee approval and participant informed consent, if relevant | Methods (Data availability ) |
| 5 | **Assumptions** | Explicitly state the three core IV assumptions for the main analysis (relevance, independence and exclusion restriction) as well assumptions for any additional or sensitivity analysis | Methods (Mendelian randomization analysis) & Emethods (Bayesian co-localization analysis) |
| 6 | **Statistical methods: main analysis** | Describe statistical methods and statistics used |  |
|  | a) | Describe how quantitative variables were handled in the analyses (i.e., scale, units, model) | Methods (Mendelian randomization analysis) |
|  | b) | Describe how genetic variants were handled in the analyses and, if applicable, how their weights were selected | Methods (Mendelian randomization analysis) |
|  | c) | Describe the MR estimator (e.g. two-stage least squares, Wald ratio) and related statistics. Detail the included covariates and, in case of two-sample MR, whether the same covariate set was used for adjustment in the two samples | Methods (Mendelian randomization analysis) |
|  | d) | Explain how missing data were addressed | N/A |
|  | e) | If applicable, indicate how multiple testing was addressed | Methods (Statistical Analysis) |
| 7 | **Assessment of assumptions** | Describe any methods or prior knowledge used to assess the assumptions or justify their validity | Methods (Mendelian randomization analysis) & Emethods (Bayesian co-localization analysis) |
| 8 | **Sensitivity analyses and additional analyses** | Describe any sensitivity analyses or additional analyses performed (e.g. comparison of effect estimates from different approaches, independent replication, bias analytic techniques, validation of instruments, simulations) | Methods (Mendelian randomization analysis) & Emethods (Bayesian co-localization analysis) |
| 9 | **Software and pre-registration** |  |  |
|  | a) | Name statistical software and package(s), including version and settings used | Methods (Statistical analysis) |
|  | b) | State whether the study protocol and details were pre-registered (as well as when and where) | N/A |
|  | **RESULTS** |  |  |
| 10 | **Descriptive data** |  |  |
|  | a) | Report the numbers of individuals at each stage of included studies and reasons for exclusion. Consider use of a flow-diagram | Results (Genetic associations of proteins with conventional inflammatory skin diseases) & eTable 3 |
|  | b) | Report summary statistics for phenotypic exposure(s), outcome(s) and other relevant variables (e.g. means, SDs, proportions) | eTable 3 |
|  | c) | If the data sources include meta-analyses of previous studies, provide the assessments of heterogeneity across these studies | N/A |
|  | d) | For two-sample Mendelian randomisation: | N/A |
| i.  Provide justification of the similarity of the genetic variant-exposure associations between the exposure and outcome samples |
| ii.  Provide information on the number of individuals who were in both samples for the exposure and for the outcome |
| 11 | **Main results** |  |  |
|  | a) | Report the associations between genetic variant and exposure, and between genetic variant and outcome, preferably on an interpretable scale | Results (Genetic associations of proteins with conventional inflammatory skin diseases) & eTable 10 |
|  | b) | Report MR estimates of the relationship between exposure and outcome, and the measures of uncertainty from the MR analysis, on an interpretable scale, such as odds ratio or relative risk per SD difference | Results (Exploring Aging-Related Drug Targets) & eTable 11-15 |
|  | c) | If relevant, consider translating estimates of relative risk into absolute risk for a meaningful time period | N/A |
|  | d) | Consider plots to visualize results (e.g. forest plot, scatterplot of associations between genetic variants and outcome versus between genetic variants and exposure) | Figures 2 |
| 12 | **Assessment of assumptions** |  |  |
|  | a) | Report the assessment of the validity of the assumptions | Results (Genetic associations of proteins with conventional inflammatory skin diseases) |
|  | b) | Report any additional statistics (e.g., assessments of heterogeneity across genetic variants, such as I2, Q statistic or E-value) | eTable 10 |
| 13 | **Sensitivity analyses and additional analyses** |  |  |
|  | a) | Report any sensitivity analyses to assess the robustness of the main results to violations of the assumptions | Results (Genetic associations of proteins with conventional inflammatory skin diseases) |
|  | b) | Report results from other sensitivity analyses or additional analyses |
|  | c) | Report any assessment of direction of causal relationship (e.g., bidirectional MR) | Results (Genetic associations of proteins with conventional inflammatory skin diseases) |
|  | d) | When relevant, report and compare with estimates from non-MR analyses | N/A |
|  | e) | Consider additional plots to visualize results (e.g., leave-one-out analyses) | Figure 2 |
|  | **DISCUSSION** |  |  |
| 14 | **Key results** | Summarize key results with reference to study objectives | Discussion (paragraph 1) |
| 15 | **Limitations** | Discuss limitations of the study, taking into account the validity of the IV assumptions, other sources of potential bias, and imprecision. Discuss both direction and magnitude of any potential bias and any efforts to address them | Discussion (paragraph 7) |
| 16 | **Interpretation** |  |  |
|  | a) | Meaning: Give a cautious overall interpretation of results in the context of their limitations and in comparison with other studies | Discussion (paragraph 1-6) |
|  | b) | Mechanism: Discuss underlying biological mechanisms that could drive a potential causal relationship between the investigated exposure and the outcome, and whether the gene-environment equivalence assumption is reasonable. Use causal language carefully, clarifying that IV estimates may provide causal effects only under certain assumptions | Discussion (paragraph 2-6) |
|  | c) | Clinical relevance: Discuss whether the results have clinical or public policy relevance, and to what extent they inform effect sizes of possible interventions | Discussion (paragraph 7) |
| 17 | **Generalizability** | Discuss the generalizability of the study results (a) to other populations, (b) across other exposure periods/timings, and (c) across other levels of exposure | Discussion (paragraph 7) |
|  | **OTHER INFORMATION** |  |  |
| 18 | **Funding** | Describe sources of funding and the role of funders in the present study and, if applicable, sources of funding for the databases and original study or studies on which the present study is based | Funding section |
| 19 | **Data and data sharing** | Provide the data used to perform all analyses or report where and how the data can be accessed, and reference these sources in the article. Provide the statistical code needed to reproduce the results in the article,or report whether the code is publicly accessible and if so, where | Data share statement & eTable 3 |
| 20 | **Conflicts of Interest** | All authors should declare all potential conflicts of interest | Competing interests section |

**eTable 3. Details of the source data.**

| **GWAS ID** | **Trait** | **Consortium** | **Sample size** | **Case** | **Control** | **PMID** | **Population** |
| --- | --- | --- | --- | --- | --- | --- | --- |
| Serum protein data | 2923 Serum protein expression | UKB-PPP | 53,021 |  |  | 37794186 | European |
| Serum cis Pqtl validation cohort | 4907 Serum protein expression | DECODE | 35,559 |  |  | 34857953 | European |
| Serum cis Pqtl validation cohort | 4775 Serum protein expression | FinnGen | 10,708 |  |  | 34648354 | European |
| Serum cis Pqtl validation cohort | 734 Serum protein expression | GWAS_meta analysis |  |  |  | 32895551 | European |
| Serum cis Pqtl training cohort | 2923 Serum protein expression | UKB-PPP | 53,021 |  |  | 37794186 | European |
| L12_PSORIASIS | psoriasis | FinnGen | 407,876 | 10,312 | 397,564 | 36653562 | European |
| PheCode_690.1 | seborrheic dermatitis | UKB | 402,725 | 53 | 402,672 | 36138231 | European |

| **eTable 4. Details of the single cell RNAseq data of psoriasis.** | | | | | |
| --- | --- | --- | --- | --- | --- |
| **Trait** | **dataset** | **Sample size** | **Case** | **Control** | **PMID** |
| psoriasis | GSE173706 | 22 | 14 | 8 | 35862195 |

| **eTable 5. Associations of circulating protein levels with incident psoriasis** | | | | | |
| --- | --- | --- | --- | --- | --- |
| Variable | HR | Lower | Upper | PValue | Adjusted pvalue |
| IL19 | 1.52 | 1.42 | 1.64 | 5.84E-31 | 1.71E-27 |
| DEFB4A_DEFB4B | 1.61 | 1.47 | 1.76 | 1.51E-25 | 2.20E-22 |
| PI3 | 1.45 | 1.35 | 1.56 | 2.25E-25 | 2.20E-22 |
| IL36G | 1.19 | 1.11 | 1.27 | 2.20E-07 | 1.61E-04 |
| TPP1 | 1.20 | 1.12 | 1.30 | 1.61E-06 | 9.43E-04 |
| SCLY | 1.15 | 1.05 | 1.25 | 2.31E-06 | 9.66E-04 |
| RPA2 | 1.09 | 1.01 | 1.18 | 2.25E-06 | 9.66E-04 |
| SEPTIN8 | 1.13 | 1.04 | 1.23 | 2.96E-06 | 9.93E-04 |
| CTSE | 1.10 | 1.01 | 1.20 | 3.05E-06 | 9.93E-04 |
| FAM13A | 1.09 | 1.01 | 1.19 | 3.64E-06 | 1.07E-03 |
| AGER | 0.91 | 0.83 | 1.00 | 4.20E-06 | 1.12E-03 |
| PCSK9 | 1.09 | 1.00 | 1.20 | 4.88E-06 | 1.19E-03 |
| MMP12 | 1.14 | 1.04 | 1.25 | 5.91E-06 | 1.33E-03 |
| COL5A1 | 1.19 | 1.10 | 1.28 | 9.46E-06 | 1.98E-03 |
| CCL22 | 1.20 | 1.10 | 1.31 | 1.74E-05 | 3.40E-03 |
| CDCP1 | 1.22 | 1.11 | 1.33 | 1.96E-05 | 3.59E-03 |
| CXCL9 | 1.19 | 1.10 | 1.30 | 2.48E-05 | 4.27E-03 |
| IL32 | 1.18 | 1.09 | 1.28 | 3.77E-05 | 6.13E-03 |
| IL22 | 1.18 | 1.09 | 1.27 | 4.51E-05 | 6.95E-03 |
| MMP1 | 1.20 | 1.10 | 1.32 | 5.33E-05 | 7.67E-03 |
| VEGFA | 1.16 | 1.07 | 1.26 | 5.50E-05 | 7.67E-03 |
| PRSS8 | 1.18 | 1.07 | 1.30 | 6.15E-05 | 8.19E-03 |
| EREG | 1.18 | 1.09 | 1.28 | 7.16E-05 | 9.12E-03 |
| NRTN | 1.15 | 1.07 | 1.24 | 8.17E-05 | 9.97E-03 |
| AREG | 1.17 | 1.08 | 1.27 | 9.57E-05 | 1.08E-02 |
| RRM2 | 1.14 | 1.07 | 1.22 | 9.25E-05 | 1.08E-02 |
| NHLRC3 | 1.20 | 1.09 | 1.31 | 1.15E-04 | 1.25E-02 |
| NPL | 1.19 | 1.09 | 1.31 | 1.28E-04 | 1.30E-02 |
| WFDC12 | 1.20 | 1.09 | 1.32 | 1.24E-04 | 1.30E-02 |
| GLA | 1.18 | 1.08 | 1.28 | 1.37E-04 | 1.34E-02 |
| CTSD | 1.16 | 1.07 | 1.26 | 1.66E-04 | 1.53E-02 |
| ICAM1 | 1.18 | 1.08 | 1.29 | 1.67E-04 | 1.53E-02 |
| GPR15L | 1.18 | 1.08 | 1.29 | 1.86E-04 | 1.65E-02 |
| PRCP | 1.18 | 1.08 | 1.28 | 1.93E-04 | 1.66E-02 |
| CD74 | 1.18 | 1.08 | 1.30 | 2.13E-04 | 1.78E-02 |
| LGALS3BP | 1.15 | 1.07 | 1.24 | 2.58E-04 | 2.10E-02 |
| FUT3_FUT5 | 1.18 | 1.08 | 1.29 | 3.23E-04 | 2.55E-02 |
| CCL17 | 1.17 | 1.07 | 1.27 | 3.78E-04 | 2.91E-02 |
| ACY1 | 1.18 | 1.07 | 1.29 | 4.53E-04 | 3.31E-02 |
| CD80 | 1.16 | 1.07 | 1.26 | 4.42E-04 | 3.31E-02 |
| IGSF3 | 1.15 | 1.06 | 1.24 | 4.92E-04 | 3.48E-02 |
| PTPRK | 1.12 | 1.05 | 1.20 | 4.98E-04 | 3.48E-02 |
| TNFRSF6B | 1.16 | 1.07 | 1.26 | 5.66E-04 | 3.85E-02 |
| ADAMTSL2 | 1.16 | 1.06 | 1.26 | 5.87E-04 | 3.91E-02 |
| CHCHD10 | 1.16 | 1.07 | 1.26 | 6.16E-04 | 4.01E-02 |
| C4BPB | 0.85 | 0.78 | 0.93 | 6.48E-04 | 4.12E-02 |
| LGMN | 1.16 | 1.06 | 1.26 | 7.13E-04 | 4.16E-02 |
| NOS2 | 1.14 | 1.06 | 1.23 | 7.24E-04 | 4.16E-02 |
| PLXNB2 | 1.16 | 1.06 | 1.26 | 6.87E-04 | 4.16E-02 |
| SEMA7A | 1.14 | 1.06 | 1.24 | 7.10E-04 | 4.16E-02 |
| SLAMF8 | 1.17 | 1.07 | 1.28 | 6.86E-04 | 4.16E-02 |
| CXCL11 | 1.15 | 1.06 | 1.25 | 7.75E-04 | 4.33E-02 |
| GUSB | 1.17 | 1.07 | 1.29 | 7.84E-04 | 4.33E-02 |
| ALDH3A1 | 1.14 | 1.05 | 1.23 | 9.16E-04 | 4.41E-02 |
| DCTPP1 | 1.16 | 1.06 | 1.27 | 8.54E-04 | 4.41E-02 |
| DPP7 | 1.16 | 1.06 | 1.26 | 9.15E-04 | 4.41E-02 |
| IL17A | 1.13 | 1.05 | 1.21 | 9.18E-04 | 4.41E-02 |
| IL6 | 1.14 | 1.06 | 1.24 | 8.98E-04 | 4.41E-02 |
| PLA2G15 | 1.16 | 1.06 | 1.26 | 9.33E-04 | 4.41E-02 |
| FGF21 | 1.16 | 1.06 | 1.27 | 9.67E-04 | 4.50E-02 |
| GSN | 0.90 | 0.84 | 0.96 | 9.88E-04 | 4.52E-02 |
| NID1 | 1.15 | 1.06 | 1.26 | 1.11E-03 | 4.99E-02 |

**eTable 6. CIS-pQTL available in UKB-PPP cohort database.**

| SNP | chr | pos | eaf | beta | se | pval | other allele | effect allele | exposure | F statistics |
| --- | --- | --- | --- | --- | --- | --- | --- | --- | --- | --- |
| rs121912698 | 3 | 51988821 | 0.00 | -1.65 | 0.044 | 1.0E-200 | C | T | ACY1 | 1391.2 |
| rs1008250 | 9 | 133532712 | 0.28 | 0.11 | 0.007 | 1.1E-53 | A | G | ADAMTSL2 | 238.0 |
| rs204993 | 6 | 32187804 | 0.32 | -0.16 | 0.006 | 4.4E-143 | A | G | AGER | 648.6 |
| rs4646787 | 17 | 19745936 | 0.66 | 0.47 | 0.006 | 1.0E-200 | A | G | ALDH3A1 | 5625.8 |
| rs1691273 | 4 | 74457928 | 0.70 | -0.16 | 0.007 | 3.6E-133 | C | T | AREG | 603.1 |
| rs3813948 | 1 | 207096513 | 0.08 | -0.29 | 0.011 | 9.0E-159 | T | C | C4BPB | 720.8 |
| rs9302690 | 16 | 57409056 | 0.10 | 0.38 | 0.011 | 1.0E-200 | G | A | CCL17 | 1300.5 |
| rs41398344 | 16 | 57360481 | 0.01 | -0.80 | 0.032 | 5.7E-138 | T | C | CCL22 | 625.1 |
| rs55796634 | 5 | 150412774 | 0.10 | -0.09 | 0.009 | 7.5E-21 | C | T | CD74 | 87.7 |
| rs150475322 | 3 | 119567209 | 0.12 | 0.59 | 0.009 | 1.0E-200 | A | G | CD80 | 4224.4 |
| rs2276862 | 3 | 45146293 | 0.17 | -0.30 | 0.007 | 1.0E-200 | C | G | CDCP1 | 1708.2 |
| rs62240638 | 22 | 23721299 | 0.07 | -0.13 | 0.011 | 3.5E-31 | G | A | CHCHD10 | 134.9 |
| rs12002679 | 9 | 134641788 | 0.29 | 0.22 | 0.007 | 1.0E-200 | C | G | COL5A1 | 1020.5 |
| rs55861089 | 11 | 1762527 | 0.11 | -0.49 | 0.010 | 1.0E-200 | A | G | CTSD | 2479.7 |
| rs41302235 | 1 | 206012565 | 0.19 | -0.62 | 0.008 | 1.0E-200 | T | C | CTSE | 6472.9 |
| rs35170645 | 4 | 76043803 | 0.52 | -0.24 | 0.006 | 1.0E-200 | A | G | CXCL11 | 1597.6 |
| rs4241577 | 4 | 76009623 | 0.24 | -0.15 | 0.007 | 2.7E-118 | C | A | CXCL9 | 534.7 |
| rs146094440 | 16 | 30424280 | 0.01 | -0.50 | 0.029 | 1.5E-66 | C | G | DCTPP1 | 297.0 |
| rs73184376 | 8 | 8410826 | 0.18 | 0.08 | 0.008 | 1.4E-27 | G | A | DEFB4A_DEFB4B | 118.4 |
| rs8109160 | 19 | 4247479 | 0.31 | -0.40 | 0.006 | 1.0E-200 | C | T | EBI3_IL27 | 4026.8 |
| rs78803121 | 4 | 74382788 | 0.06 | -0.19 | 0.013 | 7.0E-47 | G | T | EREG | 206.8 |
| rs35916067 | 4 | 89014507 | 0.17 | -0.17 | 0.008 | 2.8E-98 | T | C | FAM13A | 442.7 |
| rs838131 | 19 | 48757420 | 0.47 | -0.12 | 0.006 | 1.1E-88 | A | C | FGF21 | 398.7 |
| rs17855739 | 19 | 5831829 | 0.05 | -1.12 | 0.013 | 1.0E-200 | C | T | FUT3_FUT5 | 7043.4 |
| rs3027578 | 23 | 101409320 | 0.01 | 1.53 | 0.021 | 1.0E-200 | T | A | GLA | 5372.4 |
| rs4399275 | 10 | 84159182 | 0.43 | 0.22 | 0.006 | 1.0E-200 | T | G | GPR15L | 1260.3 |
| rs116185403 | 9 | 121321364 | 0.01 | 1.03 | 0.038 | 7.0E-164 | C | T | GSN | 744.3 |
| rs199762976 | 7 | 66773082 | 0.51 | 0.13 | 0.006 | 2.5E-108 | TG | T | GUSB | 488.9 |
| rs5030379 | 19 | 10282929 | 0.37 | 0.41 | 0.006 | 1.0E-200 | C | CTT | ICAM1 | 4343.6 |
| rs2284860 | 1 | 116580265 | 0.22 | 0.11 | 0.007 | 1.8E-54 | T | C | IGSF3 | 241.6 |
| rs2243191 | 1 | 206842612 | 0.78 | 0.36 | 0.007 | 1.0E-200 | T | C | IL19 | 2561.5 |
| rs760407193 | 12 | 68265134 | 0.27 | 0.10 | 0.007 | 3.0E-46 | AAG | A | IL22 | 203.9 |
| rs45499297 | 16 | 3065271 | 0.10 | -0.38 | 0.010 | 1.0E-200 | T | C | IL32 | 1463.7 |
| rs13407838 | 2 | 112987851 | 0.17 | -0.11 | 0.008 | 4.9E-37 | A | G | IL36G | 161.6 |
| rs111526614 | 17 | 78966679 | 0.02 | -0.49 | 0.023 | 2.2E-98 | C | T | LGALS3BP | 443.2 |
| rs148659834 | 14 | 92709697 | 0.01 | -1.00 | 0.027 | 1.0E-200 | G | A | LGMN | 1372.6 |
| rs471994 | 11 | 102827000 | 0.37 | -0.46 | 0.006 | 1.0E-200 | G | A | MMP1 | 5044.1 |
| rs17368814 | 11 | 102877965 | 0.12 | -0.74 | 0.009 | 1.0E-200 | A | G | MMP12 | 7325.7 |
| rs149175958 | 13 | 39047828 | 0.00 | -2.12 | 0.047 | 1.0E-200 | G | T | NHLRC3 | 2011.6 |
| rs76183323 | 1 | 236067017 | 0.01 | -0.77 | 0.031 | 4.9E-131 | G | A | NID1 | 593.3 |
| rs116448311 | 1 | 183127290 | 0.00 | -1.69 | 0.039 | 1.0E-200 | C | T | NPL | 1828.3 |
| rs36055559 | 19 | 5799422 | 0.17 | -0.08 | 0.009 | 1.8E-21 | G | A | NRTN | 90.5 |
| rs11591147 | 1 | 55039974 | 0.02 | -1.12 | 0.023 | 1.0E-200 | G | T | PCSK9 | 2304.8 |
| rs35770435 | 20 | 45160163 | 0.18 | 0.35 | 0.008 | 1.0E-200 | C | T | PI3 | 2065.4 |
| rs7672 | 16 | 68260897 | 0.72 | -0.24 | 0.007 | 1.0E-200 | C | G | PLA2G15 | 1298.1 |
| rs11547731 | 22 | 50283705 | 0.65 | -0.70 | 0.006 | 1.0E-200 | T | C | PLXNB2 | 12848.3 |
| rs536130717 | 11 | 83030277 | 0.00 | -1.60 | 0.067 | 2.3E-126 | G | A | PRCP | 571.8 |
| rs59735493 | 16 | 31121779 | 0.30 | 0.11 | 0.006 | 7.9E-73 | G | A | PRSS8 | 325.8 |
| rs11422080 | 6 | 128062417 | 0.84 | -0.12 | 0.008 | 2.0E-45 | G | GA | PTPRK | 200.1 |
| rs17185052 | 1 | 27914572 | 0.07 | 0.21 | 0.013 | 6.5E-61 | G | A | RPA2 | 271.1 |
| rs6737932 | 2 | 10124166 | 0.74 | -0.05 | 0.007 | 3.8E-14 | T | C | RRM2 | 57.3 |
| rs62196005 | 2 | 238098489 | 0.29 | 0.20 | 0.007 | 1.0E-200 | A | T | SCLY | 938.9 |
| rs78994380 | 15 | 74400071 | 0.11 | -0.23 | 0.010 | 2.9E-118 | C | A | SEMA7A | 534.6 |
| rs30514 | 5 | 132779155 | 0.14 | -0.15 | 0.009 | 4.3E-60 | C | T | SEPTIN8 | 267.3 |
| rs34687326 | 1 | 159830120 | 0.12 | -1.36 | 0.010 | 1.0E-200 | G | A | SLAMF8 | 19772.5 |
| rs6011040 | 20 | 63706054 | 0.67 | -0.30 | 0.006 | 1.0E-200 | A | G | TNFRSF6B | 2226.6 |
| rs140726254 | 11 | 6617713 | 0.00 | 2.91 | 0.067 | 1.0E-200 | G | A | TPP1 | 1905.7 |
| rs6921438 | 6 | 43957870 | 0.48 | -0.67 | 0.006 | 1.0E-200 | G | A | VEGFA | 12662.2 |
| rs13042449 | 20 | 45124820 | 0.43 | -0.43 | 0.006 | 1.0E-200 | G | A | WFDC12 | 5992.6 |
| rs2031676105 | 17 | 27836223 | 0.28 | -0.08 | 0.007 | 4.4E-31 | TG | T | NOS2 | 134.4 |

**eTable 7. Associations between genetically proxied protein expression and psoriasis.**

| exposure | beta | se | pvalue | pve | Odds ratio | Low 95%CI | Upper 95%CI | steiger pvalue |
| --- | --- | --- | --- | --- | --- | --- | --- | --- |
| CTSD | 0.01 | 0.06 | 8.52E-01 | 0.067 | 1.01 | 0.89 | 1.14 | 0.00E+00 |
| CHCHD10 | -0.12 | 0.16 | 4.66E-01 | 0.004 | 0.89 | 0.65 | 1.22 | 2.06E-86 |
| LGMN | 0.06 | 0.06 | 2.82E-01 | 0.038 | 1.07 | 0.95 | 1.20 | 1.58E-10 |
| DEFB4A_DEFB4B | -0.12 | 0.23 | 6.00E-01 | 0.003 | 0.89 | 0.57 | 1.38 | 0.00E+00 |
| RRM2 | 0.22 | 0.27 | 4.13E-01 | 0.002 | 1.25 | 0.73 | 2.13 | 2.76E-119 |
| ACY1 | 0.07 | 0.07 | 3.18E-01 | 0.039 | 1.07 | 0.94 | 1.22 | 5.79E-73 |
| VEGFA | 0.04 | 0.02 | 3.47E-02 | 0.268 | 1.05 | 1.00 | 1.09 | 0.00E+00 |
| DCTPP1 | -0.18 | 0.29 | 5.40E-01 | 0.009 | 0.84 | 0.47 | 1.48 | 0.00E+00 |
| SLAMF8 | 0.00 | 0.02 | 8.64E-01 | 0.364 | 1.00 | 0.97 | 1.03 | 1.42E-22 |
| ALDH3A1 | -0.03 | 0.03 | 3.08E-01 | 0.140 | 0.97 | 0.91 | 1.03 | 9.04E-23 |
| FUT3_FUT5 | -0.03 | 0.04 | 3.59E-01 | 0.169 | 0.97 | 0.90 | 1.04 | 2.17E-120 |
| CTSE | 0.06 | 0.03 | 3.17E-02 | 0.158 | 1.06 | 1.01 | 1.13 | 4.29E-243 |
| GPR15L | 0.07 | 0.07 | 2.86E-01 | 0.035 | 1.08 | 0.94 | 1.23 | 1.57E-257 |
| FAM13A | 0.37 | 0.12 | 3.08E-03 | 0.013 | 1.45 | 1.13 | 1.85 | 0.00E+00 |
| GSN | -0.13 | 0.26 | 6.03E-01 | 0.021 | 0.88 | 0.53 | 1.44 | 1.45E-114 |
| SCLY | 0.20 | 0.09 | 1.69E-02 | 0.026 | 1.23 | 1.04 | 1.45 | 1.25E-92 |
| CXCL9 | 0.03 | 0.10 | 7.37E-01 | 0.015 | 1.04 | 0.84 | 1.27 | 2.75E-23 |
| IL36G | -0.05 | 0.25 | 8.46E-01 | 0.005 | 0.95 | 0.58 | 1.57 | 0.00E+00 |
| PLXNB2 | -0.05 | 0.02 | 1.66E-02 | 0.271 | 0.95 | 0.91 | 0.99 | 0.00E+00 |
| PRSS8 | 0.57 | 0.13 | 2.22E-05 | 0.009 | 1.77 | 1.36 | 2.30 | 9.47E-265 |
| IL32 | 0.09 | 0.09 | 3.23E-01 | 0.041 | 1.09 | 0.92 | 1.29 | 2.88E-10 |
| CDCP1 | 0.02 | 0.06 | 7.70E-01 | 0.047 | 1.02 | 0.90 | 1.15 | 3.72E-12 |
| SEMA7A | 0.14 | 0.12 | 2.40E-01 | 0.015 | 1.15 | 0.91 | 1.45 | 4.76E-52 |
| RPA2 | 0.32 | 0.16 | 4.92E-02 | 0.008 | 1.37 | 1.00 | 1.88 | 0.00E+00 |
| MMP1 | -0.02 | 0.03 | 4.94E-01 | 0.127 | 0.98 | 0.92 | 1.04 | 3.27E-50 |
| WFDC12 | 0.01 | 0.03 | 6.59E-01 | 0.148 | 1.01 | 0.95 | 1.08 | 1.63E-15 |
| CD80 | 0.05 | 0.04 | 2.02E-01 | 0.109 | 1.05 | 0.97 | 1.13 | 1.22E-46 |
| FGF21 | -0.17 | 0.12 | 1.52E-01 | 0.011 | 0.85 | 0.68 | 1.06 | 1.35E-34 |
| IL19 | -0.01 | 0.04 | 8.66E-01 | 0.069 | 0.99 | 0.91 | 1.08 | 0.00E+00 |
| IGSF3 | -0.14 | 0.17 | 4.11E-01 | 0.007 | 0.87 | 0.63 | 1.21 | 0.00E+00 |
| SEPTIN8 | 0.33 | 0.11 | 2.58E-03 | 0.008 | 1.39 | 1.12 | 1.72 | 1.66E-20 |
| COL5A1 | -0.10 | 0.07 | 1.56E-01 | 0.029 | 0.91 | 0.79 | 1.04 | 6.95E-73 |
| CCL17 | 0.03 | 0.09 | 7.65E-01 | 0.036 | 1.03 | 0.87 | 1.21 | 0.00E+00 |
| CXCL11 | -0.01 | 0.06 | 9.25E-01 | 0.044 | 0.99 | 0.89 | 1.12 | 0.00E+00 |
| PRCP | 0.53 | 0.43 | 2.13E-01 | 0.016 | 1.70 | 0.74 | 3.93 | 6.37E-133 |
| PLA2G15 | -0.09 | 0.06 | 1.59E-01 | 0.036 | 0.91 | 0.81 | 1.04 | 1.14E-24 |
| PI3 | 0.08 | 0.05 | 1.06E-01 | 0.056 | 1.09 | 0.98 | 1.20 | 0.00E+00 |
| MMP12 | 0.05 | 0.02 | 3.66E-02 | 0.175 | 1.05 | 1.00 | 1.11 | 0.00E+00 |
| LGALS3BP | 0.11 | 0.16 | 4.65E-01 | 0.013 | 1.12 | 0.83 | 1.52 | 0.00E+00 |
| EBI3_IL27 | 0.03 | 0.04 | 5.17E-01 | 0.108 | 1.03 | 0.94 | 1.12 | 5.86E-167 |
| AREG | -0.14 | 0.11 | 2.10E-01 | 0.017 | 0.87 | 0.71 | 1.08 | 8.15E-161 |
| ADAMTSL2 | 0.19 | 0.14 | 1.84E-01 | 0.007 | 1.21 | 0.91 | 1.60 | 0.00E+00 |
| EREG | 0.11 | 0.21 | 6.16E-01 | 0.006 | 1.11 | 0.74 | 1.68 | 1.58E-103 |
| CCL22 | 0.15 | 0.26 | 5.65E-01 | 0.018 | 1.16 | 0.70 | 1.92 | 5.74E-93 |
| NRTN | 0.25 | 0.23 | 2.78E-01 | 0.003 | 1.28 | 0.82 | 1.99 | 7.88E-133 |
| TPP1 | -0.11 | 0.21 | 6.04E-01 | 0.052 | 0.90 | 0.59 | 1.36 | 0.00E+00 |
| CD74 | 0.04 | 0.34 | 9.16E-01 | 0.003 | 1.04 | 0.54 | 2.00 | 0.00E+00 |
| PCSK9 | 0.07 | 0.03 | 2.89E-02 | 0.063 | 1.08 | 1.01 | 1.15 | 0.00E+00 |
| NHLRC3 | 0.27 | 0.16 | 8.00E-02 | 0.055 | 1.31 | 0.97 | 1.78 | 2.35E-19 |
| C4BPB | -0.04 | 0.11 | 6.85E-01 | 0.020 | 0.96 | 0.78 | 1.18 | 0.00E+00 |
| AGER | -1.41 | 0.11 | 4.72E-38 | 0.018 | 0.24 | 0.20 | 0.30 | 0.00E+00 |
| NID1 | -0.08 | 0.06 | 1.97E-01 | 0.017 | 0.92 | 0.82 | 1.04 | 0.00E+00 |
| TNFRSF6B | -0.02 | 0.05 | 7.23E-01 | 0.061 | 0.98 | 0.88 | 1.09 | 9.25E-217 |
| NPL | 0.12 | 0.14 | 3.80E-01 | 0.050 | 1.13 | 0.86 | 1.47 | 0.00E+00 |

| **eTable 8. The confuder traits associated with Variants of candidate drugtarget protein.** | | | | | | |
| --- | --- | --- | --- | --- | --- | --- |
| exposure | snp | r2 | trait | pmid | p | catalog |
| PCSK9 | rs11591147 | 1.0 | APOB assay lipoprotein fraction concentration in fasting sample | 19936222 | 5.3E-23 | GWAS |
| PCSK9 | rs11591147 | 1.0 | Circulating PCSK9 levels | 22460556 | 2.2E-15 | GWAS |
| PCSK9 | rs11591147 | 1.0 | LDL cholesterol | 18193044 | 2.0E-44 | GWAS |
| PCSK9 | rs11591147 | 1.0 | LDL cholesterol | 19913121 | 5.0E-12 | GWAS |
| PCSK9 | rs11591147 | 1.0 | Low density lipoprotein | 24097068 | 8.6E-143 | GWAS |
| PCSK9 | rs11591147 | 1.0 | Total cholesterol | 24097068 | 8.8E-86 | GWAS |
| PCSK9 | rs11591147 | 1.0 | APOB apolipoprotein B | 19802338 | 1.8E-10 | GWAS |
| PCSK9 | rs11591147 | 1.0 | APOB apolipoprotein B | 19913121 | 1.1E-10 | GWAS |
| PCSK9 | rs11591147 | 1.0 | APOB assay lipoprotein fraction concentration | 19936222 | 7.8E-28 | GWAS |
| PCSK9 | rs11591147 | 1.0 | LDL cholesterol response to statins baseline LDL cholesterol | 22331829 | 4.7E-09 | GWAS |
| PCSK9 | rs11591147 | 1.0 | LDL cholesterol total lipoprotein fraction concentration | 19936222 | 7.0E-22 | GWAS |
| PCSK9 | rs11591147 | 1.0 | LDL cholesterol total lipoprotein fraction concentration in fasting sample | 19936222 | 8.2E-18 | GWAS |
| PCSK9 | rs11591147 | 1.0 | Total cholesterol | 23063622 | 2.5E-52 | GWAS |
| PCSK9 | rs11591147 | 1.0 | LDL cholesterol | 22460556 | 2.1E-14 | GWAS |
| PCSK9 | rs11591147 | 1.0 | LDL cholesterol | 22629316 | 1.7E-28 | GWAS |
| PCSK9 | rs11591147 | 1.0 | LDL cholesterol | 23063622 | 3.1E-59 | GWAS |
| PCSK9 | rs11591147 | 1.0 | LDL cholesterol female | 22629316 | 2.7E-14 | GWAS |
| PCSK9 | rs11591147 | 1.0 | LDL cholesterol large lipoprotein fraction concentration | 19936222 | 2.2E-13 | GWAS |
| PCSK9 | rs11591147 | 1.0 | LDL cholesterol large lipoprotein fraction concentration in fasting sample | 19936222 | 1.2E-10 | GWAS |
| PCSK9 | rs11591147 | 1.0 | LDL cholesterol lipoprotein fraction concentration | 19936222 | 1.3E-28 | GWAS |
| PCSK9 | rs11591147 | 1.0 | LDL cholesterol lipoprotein fraction concentration in fasting sample | 19936222 | 1.3E-23 | GWAS |
| PCSK9 | rs11591147 | 1.0 | LDL cholesterol male | 22629316 | 8.2E-18 | GWAS |
| PCSK9 | rs11591147 | 1.0 | LDL cholesterol | 25961943 | 2.0E-92 | GWAS |
| PCSK9 | rs11591147 | 1.0 | Metabolite levels lipoprotein measures | 27005778 | 3.0E-61 | GWAS |
| PCSK9 | rs11591147 | 1.0 | Response to statin therapy LDL C | 22331829 | 5.0E-09 | GWAS |
| PCSK9 | rs11591147 | 1.0 | Coronary artery disease | 28714975 | 2.8E-10 | GWAS |
| PCSK9 | rs11591147 | 1.0 | Low density lipoprotein | 28887542 | 2.0E-08 | GWAS |
| PCSK9 | rs11591147 | 1.0 | Cholesterol ldl | 18193044 | 2.0E-44 | GWAS |
| PCSK9 | rs11591147 | 1.0 | Cholesterol ldl | 22331829 | 5.0E-09 | GWAS |
| PCSK9 | rs11591147 | 1.0 | Concentration of small VLDL particles | 27005778 | 7.5E-09 | mQTL |
| PCSK9 | rs11591147 | 1.0 | Concentration of very small VLDL particles | 27005778 | 9.5E-20 | mQTL |
| PCSK9 | rs11591147 | 1.0 | Esterified cholesterol | 27005778 | 1.6E-30 | mQTL |
| PCSK9 | rs11591147 | 1.0 | Free cholesterol | 27005778 | 3.5E-35 | mQTL |
| PCSK9 | rs11591147 | 1.0 | Free cholesterol in IDL | 27005778 | 1.3E-46 | mQTL |
| PCSK9 | rs11591147 | 1.0 | Free cholesterol in large LDL | 27005778 | 2.0E-50 | mQTL |
| PCSK9 | rs11591147 | 1.0 | Free cholesterol in small VLDL | 27005778 | 4.7E-15 | mQTL |
| PCSK9 | rs11591147 | 1.0 | OmegaL6 fatty acids | 27005778 | 1.1E-14 | mQTL |
| PCSK9 | rs11591147 | 1.0 | Phosphatidylcholine and other cholines | 27005778 | 8.6E-11 | mQTL |
| PCSK9 | rs11591147 | 1.0 | Phospholipids in IDL | 27005778 | 1.6E-43 | mQTL |
| PCSK9 | rs11591147 | 1.0 | Phospholipids in large LDL | 27005778 | 1.5E-46 | mQTL |
| PCSK9 | rs11591147 | 1.0 | Phospholipids in medium LDL | 27005778 | 3.6E-41 | mQTL |
| PCSK9 | rs11591147 | 1.0 | Phospholipids in small VLDL | 27005778 | 1.8E-12 | mQTL |
| PCSK9 | rs11591147 | 1.0 | Phospholipids in very small VLDL | 27005778 | 9.2E-33 | mQTL |
| PCSK9 | rs11591147 | 1.0 | Serum total cholesterol | 27005778 | 4.9E-39 | mQTL |
| PCSK9 | rs11591147 | 1.0 | Sphingomyelins | 27005778 | 3.7E-20 | mQTL |
| PCSK9 | rs11591147 | 1.0 | Total cholesterol in IDL | 27005778 | 1.6E-45 | mQTL |
| PCSK9 | rs11591147 | 1.0 | Triglycerides by NMR lipoprotein fraction | 19936222 | 3.6E-08 | GWAS |
| PCSK9 | rs11591147 | 1.0 | VLDL cholesterol small lipoprotein fraction concentration | 19936222 | 2.3E-13 | GWAS |
| PCSK9 | rs11591147 | 1.0 | VLDL cholesterol small lipoprotein fraction concentration in fasting sample | 19936222 | 4.6E-12 | GWAS |
| PCSK9 | rs11591147 | 1.0 | VLDL cholesterol total lipoprotein fraction concentration | 19936222 | 1.1E-09 | GWAS |
| PCSK9 | rs11591147 | 1.0 | VLDL cholesterol total lipoprotein fraction concentration in fasting sample | 19936222 | 3.0E-08 | GWAS |
| PCSK9 | rs11591147 | 1.0 | Cholesterol total | 28270201 | 2.0E-17 | GWAS |
| PCSK9 | rs11591147 | 1.0 | Coronary artery disease | 29212778 | 2.0E-25 | GWAS |
| PCSK9 | rs11591147 | 1.0 | Coronary artery disease | 29212778 | 2.0E-25 | GWAS |
| PCSK9 | rs11591147 | 1.0 | LDL cholesterol | 18193044 | 2.0E-44 | GWAS |
| PCSK9 | rs11591147 | 1.0 | Total lipids in small LDL | 27005778 | 6.1E-39 | mQTL |
| PCSK9 | rs11591147 | 1.0 | Total lipids in small VLDL | 27005778 | 1.5E-11 | mQTL |
| PCSK9 | rs11591147 | 1.0 | Total lipids in very small VLDL | 27005778 | 6.2E-21 | mQTL |
| PCSK9 | rs11591147 | 1.0 | Total phosphoglycerides | 27005778 | 3.2E-10 | mQTL |
| PCSK9 | rs11591147 | 1.0 | Triglycerides in IDL | 27005778 | 3.0E-20 | mQTL |
| PCSK9 | rs11591147 | 1.0 | 18:2 linoleic acid (LA) | 27005778 | 5.3E-15 | mQTL |
| PCSK9 | rs11591147 | 1.0 | ApoB | 27005778 | 2.5E-34 | mQTL |
| PCSK9 | rs11591147 | 1.0 | Cholesterol esters in large LDL | 27005778 | 8.6E-49 | mQTL |
| PCSK9 | rs11591147 | 1.0 | Cholesterol esters in medium LDL | 27005778 | 1.4E-46 | mQTL |
| PCSK9 | rs11591147 | 1.0 | Cholesterol esters in medium VLDL | 27005778 | 4.0E-11 | mQTL |
| PCSK9 | rs11591147 | 1.0 | Concentration of IDL particles | 27005778 | 1.8E-39 | mQTL |
| PCSK9 | rs11591147 | 1.0 | Concentration of large LDL particles | 27005778 | 4.5E-47 | mQTL |
| PCSK9 | rs11591147 | 1.0 | Concentration of medium LDL particles | 27005778 | 1.9E-44 | mQTL |
| PCSK9 | rs11591147 | 1.0 | Concentration of small LDL particles | 27005778 | 3.4E-36 | mQTL |
| PCSK9 | rs11591147 | 1.0 | Total cholesterol in LDL | 27005778 | 2.9E-48 | mQTL |
| PCSK9 | rs11591147 | 1.0 | Total cholesterol in large LDL | 27005778 | 5.7E-50 | mQTL |
| PCSK9 | rs11591147 | 1.0 | Total cholesterol in medium LDL | 27005778 | 2.8E-47 | mQTL |
| PCSK9 | rs11591147 | 1.0 | Total cholesterol in small LDL | 27005778 | 6.4E-43 | mQTL |
| PCSK9 | rs11591147 | 1.0 | Total cholesterol in small VLDL | 27005778 | 1.0E-21 | mQTL |
| PCSK9 | rs11591147 | 1.0 | Total fatty acids | 27005778 | 2.2E-08 | mQTL |
| PCSK9 | rs11591147 | 1.0 | Total lipids in IDL | 27005778 | 3.3E-42 | mQTL |
| PCSK9 | rs11591147 | 1.0 | Total lipids in large LDL | 27005778 | 2.1E-48 | mQTL |
| PCSK9 | rs11591147 | 1.0 | Total lipids in medium LDL | 27005778 | 1.2E-45 | mQTL |
| PCSK9 | rs11591147 | 1.0 | Triglycerides in very small VLDL | 27005778 | 4.4E-11 | mQTL |
| MMP12 | rs17368814 | 1.0 | Macrophage metalloelastase | 28369058 | 5.5E-97 | pQTL |
| MMP12 | rs17368814 | 1.0 | Stromelysin-1 | 28369058 | 1.0E-20 | pQTL |
| MMP12 | rs17368814 | 1.0 | Macrophage metalloelastase | 29875488 | 5.9E-111 | pQTL |
| MMP12 | rs17368814 | 1.0 | Local histogram emphysema pattern | 25006744 | 1.0E-08 | GWAS |
| MMP12 | rs17368814 | 1.0 | Post bronchodilator FEV1FVC ratio | 26634245 | 4.0E-10 | GWAS |
| MMP12 | rs17368814 | 1.0 | Post bronchodilator FEV1FVC ratio | 26634245 | 4.0E-10 | GWAS |
| AGER | rs204993 | 1.0 | Granulocyte percentage of myeloid white cells | 27863252 | 6.2E-11 | GWAS |
| AGER | rs204993 | 1.0 | Hematocrit | 27863252 | 1.3E-13 | GWAS |
| AGER | rs204993 | 1.0 | Hemoglobin concentration | 27863252 | 1.1E-15 | GWAS |
| AGER | rs204993 | 1.0 | High light scatter reticulocyte count | 27863252 | 4.9E-11 | GWAS |
| AGER | rs204993 | 1.0 | Lymphocyte count | 27863252 | 4.0E-16 | GWAS |
| AGER | rs204993 | 1.0 | Mean platelet volume | 27863252 | 2.3E-17 | GWAS |
| AGER | rs204993 | 1.0 | Monocyte count | 27863252 | 2.7E-23 | GWAS |
| AGER | rs204993 | 1.0 | Monocyte percentage of white cells | 27863252 | 1.3E-08 | GWAS |
| AGER | rs204993 | 1.0 | Platelet count | 27863252 | 3.4E-21 | GWAS |
| AGER | rs204993 | 1.0 | Plateletcrit | 27863252 | 1.2E-10 | GWAS |
| AGER | rs204993 | 1.0 | Red blood cell count | 27863252 | 2.3E-17 | GWAS |
| AGER | rs204993 | 1.0 | Reticulocyte count | 27863252 | 2.4E-17 | GWAS |
| AGER | rs204993 | 1.0 | Reticulocyte fraction of red cells | 27863252 | 2.8E-11 | GWAS |
| AGER | rs204993 | 1.0 | Sum eosinophil basophil counts | 27863252 | 1.7E-08 | GWAS |
| AGER | rs204993 | 1.0 | White blood cell count | 27863252 | 4.2E-11 | GWAS |
| AGER | rs204993 | 1.0 | IgA deficiency | 27723758 | 2.9E-56 | GWAS |
| AGER | rs204993 | 1.0 | Age-related macular degeneration | 26691988 | 9.4E-12 | GWAS |
| AGER | rs204993 | 1.0 | Idiopathic membranous nephropathy | 21323541 | 1.6E-33 | GWAS |
| AGER | rs204993 | 1.0 | Primary sclerosing cholangitis | 27992413 | 1.2E-52 | GWAS |
| AGER | rs204993 | 1.0 | Advanced age related macular degeneration | 26691988 | 9.0E-12 | GWAS |
| AGER | rs204993 | 1.0 | Complement factor B | 29875488 | 3.6E-12 | pQTL |
| AGER | rs204993 | 1.0 | MHC class I polypeptide-related sequence B | 29875488 | 8.3E-10 | pQTL |
| AGER | rs204993 | 1.0 | Neutrophil collagenase | 29875488 | 3.2E-08 | pQTL |
| AGER | rs204993 | 1.0 | Ubiquitin carboxyl-terminal hydrolase 25 | 29875488 | 1.3E-12 | pQTL |
| AGER | rs204993 | 1.0 | Receptor for advanced glycation endproducts | 30111768 | 5.0E-19 | pQTL |
| AGER | rs204993 | 1.0 | Advanced glycosylation end product-specific receptor, soluble | 29875488 | 6.5E-13 | pQTL |
| PRSS8 | rs59735493 | 1.0 | Acenocoumarol warfarin maintenance dose | 19578179 | 1.4E-17 | GWAS |
| VEGFA | rs6921438 | 0.9 | Vascular endothelial growth factor a | 21757650 | 0.0E+00 | GWAS |
| VEGFA | rs6921438 | 1.0 | Vascular endothelial growth factor levels | 27989323 | 2.0E-171 | GWAS |
| VEGFA | rs6921438 | 0.9 | Serum vascular endothelial growth factor VEGF | 21757650 | 0.0E+00 | GWAS |
| VEGFA | rs6921438 | 1.0 | Serum vascular endothelial growth factor VEGF | 21757650 | 0.0E+00 | GWAS |
| VEGFA | rs6921438 | 1.0 | Vascular endothelial growth factor levels | 26910538 | 0.0E+00 | GWAS |
| VEGFA | rs6921438 | 1.0 | Vascular endothelial growth factor A | 29875488 | 7.8E-71 | pQTL |
| VEGFA | rs6921438 | 0.9 | Vascular endothelial growth factor levels | 21757650 | 0.0E+00 | GWAS |
| VEGFA | rs6921438 | 1.0 | VEGF121 | 26910538 | 0.0E+00 | pQTL |
| VEGFA | rs6921438 | 1.0 | VEGF121 | 27989323 | 2.1E-171 | pQTL |
| VEGFA | rs6921438 | 0.9 | VEGF121 | 21757650 | 0.0E+00 | pQTL |
| VEGFA | rs6921438 | 1.0 | Vascular endothelial growth factor A, isoform 121 | 29875488 | 1.7E-234 | pQTL |

.

**eTable 9. SMR Associations of Serum Protein Expression with psoriasis.**

| **Gene** | **top pQTL SNP** | **pQTL association** | | | **GWAS association** | | | **SMR association** | | | **HEIDI Test** | |
| --- | --- | --- | --- | --- | --- | --- | --- | --- | --- | --- | --- | --- |
| **beta** | **se** | **p-value** | **beta** | **se** | **p-value** | **beta** | **se** | **p-value** | **p-value** | **Number of SNPs** |
| AGER | rs204993 | -0.17 | 0.01 | 2.5E-103 | 0.23 | 0.02 | 4.7E-38 | -1.33 | 0.12 | 1.7E-28 | 8.2E-21 | 20 |
| CTSE | rs1172199 | 0.08 | 0.01 | 2.6E-19 | 0.01 | 0.02 | 6.9E-01 | 0.08 | 0.20 | 6.9E-01 | 6.7E-01 | 20 |
| FAM13A | rs35916067 | -0.17 | 0.01 | 2.3E-62 | -0.06 | 0.02 | 3.1E-03 | 0.39 | 0.13 | 3.6E-03 | 9.2E-02 | 20 |
| MMP12 | rs17368814 | -0.75 | 0.01 | 0.0E+00 | -0.04 | 0.02 | 3.7E-02 | 0.05 | 0.02 | 3.7E-02 | 1.2E-01 | 20 |
| PCSK9 | rs11591147 | -1.15 | 0.03 | 0.0E+00 | -0.08 | 0.04 | 2.9E-02 | 0.07 | 0.03 | 2.9E-02 | 4.3E-01 | 15 |
| PRSS8 | rs889555 | 0.11 | 0.01 | 5.7E-49 | 0.06 | 0.01 | 2.3E-05 | 0.55 | 0.14 | 4.7E-05 | 6.9E-02 | 20 |
| RPA2 | rs17185038 | 0.20 | 0.02 | 6.2E-40 | 0.06 | 0.04 | 1.0E-01 | 0.29 | 0.18 | 1.0E-01 | 2.4E-01 | 20 |
| SCLY | rs62196005 | 0.19 | 0.01 | 1.3E-127 | 0.04 | 0.02 | 1.7E-02 | 0.21 | 0.09 | 1.7E-02 | 5.3E-01 | 20 |
| SEPTIN8 | rs30512 | -0.14 | 0.01 | 7.0E-37 | -0.05 | 0.02 | 2.6E-03 | 0.33 | 0.11 | 3.4E-03 | 5.3E-06 | 20 |
| VEGFA | rs6921438 | -0.69 | 0.01 | 0.0E+00 | -0.03 | 0.01 | 3.5E-02 | 0.04 | 0.02 | 3.5E-02 | 5.6E-01 | 20 |

| **eTable 10. Coloc colocalization analysis** | | | | | | | |
| --- | --- | --- | --- | --- | --- | --- | --- |
| exposure | outcome | nsnps | PP.H0.abf | PP.H1.abf | PP.H2.abf | PP.H3.abf | PP.H4.abf |
| AGER | psoriasis | 1301 | 7.7E-237 | 3.1E-141 | 2.5E-96 | 1.0E+00 | 1.7E-88 |
| CTSE | psoriasis | 565 | 0.0E+00 | 9.1E-01 | 0.0E+00 | 2.8E-02 | 6.0E-02 |
| FAM13A | psoriasis | 936 | 6.4E-56 | 5.3E-01 | 2.8E-57 | 2.3E-02 | 4.5E-01 |
| MMP12 | psoriasis | 832 | 0.0E+00 | 8.9E-01 | 0.0E+00 | 4.1E-02 | 7.3E-02 |
| PCSK9 | psoriasis | 987 | 0.0E+00 | 8.1E-01 | 0.0E+00 | 3.5E-02 | 1.5E-01 |
| PRSS8 | psoriasis | 430 | 8.3E-45 | 1.8E-02 | 8.4E-45 | 1.7E-02 | 9.7E-01 |
| RPA2 | psoriasis | 737 | 1.4E-33 | 8.9E-01 | 6.3E-35 | 3.9E-02 | 7.3E-02 |
| SCLY | psoriasis | 1012 | 1.3E-120 | 8.2E-01 | 1.0E-121 | 6.2E-02 | 1.2E-01 |
| SEPTIN8 | psoriasis | 619 | 3.4E-36 | 6.4E-06 | 5.4E-31 | 1.0E+00 | 5.8E-06 |
| VEGFA | psoriasis | 947 | 0.0E+00 | 8.9E-01 | 0.0E+00 | 4.8E-02 | 5.8E-02 |
